# Supplementary material
Source: PubMed Central journal article supplement (PMC2933344)
Supplement: mmc1.pdf [file mmc1.pdf]

**The American Journal of Human Genetics, Volume 87**

## **Supplemental Data**

### **Recessive Mutations in the Gene Encoding the Tight Junction Protein Occludin Cause Band-like Calcification with Simplified Gyration and Polymicrogyria**

**Mary C. O'Driscoll, Sarah Daly, Jill Urquhart, Graeme C.M. Black, Daniela T. Pilz, Knut Brockmann, Meriel McEntagart, Ghada Abdel-Salam, Maha Zaki, Nicole I. Wolf, Roger L. Ladda, Susan Sell, Stefano D'Arrigo, Waney Squier, William B. Dobyns, John H. Livingston, and Yanick J. Crow**

Figure S1. Multiple ortholog alignment for occludin

Table S1. Clinical details for all patients

Table S2. Oligonucleotide primer sequences

Table S3. Results of genome scan

|                                                                                                                 |     |                                                    |     |
|-----------------------------------------------------------------------------------------------------------------|-----|----------------------------------------------------|-----|
| Homo sapiens                                                                                                    | 1   | MSSRPLESPPPYRDEFKPNHYAPSNDIYGGEMHVRPMLSQPAYSFY PED | 50  |
| Pan troglodytes                                                                                                 | 1   | MSSRPLESPPPYRDEFKPNHYAPSNDIYGGEMHVRPMLSQPAYSFY PED | 50  |
| Canis familiaris                                                                                                | 1   | MSSRPFESPPPYRDEFKPNHYAPSNDVYGGDMHVRPMLSQPAYSFY PED | 50  |
| Bos taurus                                                                                                      | 1   | MSSRPFESPPPYRDEFKPNHYTPSNDIYSGEMHVRPMLSQPAYSFY PED | 50  |
| Mus musculus                                                                                                    | 1   | MSVRPFESPPPYRDEFKPNHYAPSNDMYGGEMHVRPMLSQPAYSFY PED | 50  |
| Rattus norvegicus                                                                                               | 1   | MSVRPFESPPPYRDEFKPNHYAPSNDMYGGEMHVRPMLSQPAYSFY PED | 50  |
| Danio rerio (a)                                                                                                 | 1   | MSSKHIGSPPPY---DYEENGYNVA-----PQPAYSYPDD           | 33  |
| Danio rerio (b)                                                                                                 | 1   | -MPRKSSHPPPY---GSRHQ--HRS-----SHRTVSYHP-D          | 29  |
| <hr/>                                                                                                           |     |                                                    |     |
| Homo sapiens                                                                                                    | 51  | EILHFYKWTSPPGVIRILSMLIIVMCIAIFACVASTLAWDRGYGTSLLG- | 99  |
| Pan troglodytes                                                                                                 | 51  | EILHFYKWTSPPGVIRILSMLIIVMCIAIFACVASTLAWDRGYGTSLLG- | 99  |
| Canis familiaris                                                                                                | 51  | EILHFYKWTSPPGVIRILSMLVIVMCIAIFGCVASTLAWDRGYGTGLMG- | 99  |
| Bos taurus                                                                                                      | 51  | EILHFYKWTSPPGVIRILSMLVIVMCIAIFACVASTLAWDRGYGT-LMG- | 98  |
| Mus musculus                                                                                                    | 51  | EILHFYKWTSPPGVIRILSMLIIVMCIAIFACVASTLAWDRGYGTGLFG- | 99  |
| Rattus norvegicus                                                                                               | 51  | EILHFYKWTSPPGVIRILSMLVIVMCIAVFAVASTLAWDRAYGTGIFG-  | 99  |
| Danio rerio                                                                                                     | 34  | EFQHFYRWTSPPGIIKIMCVLSIIFCVGIFVCVASTLAWDTNAGAAGFG- | 82  |
| Danio rerio (b)                                                                                                 | 30  | EMLHFYSWKSPPGVMKILCIIIIIMCVAMFACVAATLAWDYDANNMGLGG | 79  |
| <hr/>                                                                                                           |     |                                                    |     |
| <div style="border: 1px solid blue; padding: 5px; display: inline-block;"> <p style="margin: 0;">TM1</p> </div> |     |                                                    |     |
| <hr/>                                                                                                           |     |                                                    |     |
| Homo sapiens                                                                                                    | 100 | -----GSVGYPYGGSGFGSYGSGY-GYGY-G-----YGYGYG-GYT     | 132 |
| Pan troglodytes                                                                                                 | 100 | -----GSVGYPYGGSGFGSYGSGY-GYGY-G-----YGYGYG-GYT     | 132 |
| Canis familiaris                                                                                                | 100 | -----GSIGYPY-GSGFGSYGTGY-GYGF-G-----YGYGYG-GYT     | 131 |
| Bos taurus                                                                                                      | 99  | -----AGVNYPYAGSAFSGSYGSGY-GYGY-G-----YGYGYGTGYT    | 132 |
| Mus musculus                                                                                                    | 100 | -----GSLNYPY--SGFG-YGGGYGG-GYGG-----YGYGYG-GYT     | 130 |
| Rattus norvegicus                                                                                               | 100 | -----GSMNYPY-GSGFGSYGGGFGGYGY-G-----YGYGYG-GYT     | 132 |
| Danio rerio (a)                                                                                                 | 83  | -----TNGGY-YGGSYAGSYSSFGGTGY-GMGGAGSFGYGILGSON     | 122 |
| Danio rerio (b)                                                                                                 | 80  | LASLGMGSSGGY-NGGSYNGGSAGGYGGYGG-GMGG---YGYG-GGTYM  | 123 |

|                   |     | <b>F312</b>                              |               |     |
|-------------------|-----|------------------------------------------|---------------|-----|
| Homo sapiens      | 133 | DPRAAKGFMLAMA AFCFIAALVIFVTSVIRSEMSRTRRY | YLSV IIVSAIL  | 182 |
| Pan troglodytes   | 133 | DPRAAKGFMLAMA AFCFIAALVIFVTSVIRSEMSRTRRY | YLSV IIVSAIL  | 182 |
| Canis familiaris  | 132 | DPRAAKGFLLAMVAF CFIAALVIFVTSVIRSDISRTRRY | YLTV IILSAFL  | 181 |
| Bos taurus        | 133 | DPRAAKGFLLAMA AFCFIAALVIFVTSVVRSGISRTRRY | YLTV IIVTAVL  | 182 |
| Mus musculus      | 131 | DPRAAKGFLLAMA AFCFIASLVIFVTSVIRSGMSRTRRY | YLV IIVSAIL   | 180 |
| Rattus norvegicus | 133 | DPRAAKGFLLAMA AFCFIASLVIFVTSVIRSGMSRTRRY | YLV IIVSAIL   | 182 |
| Danio rerio (a)   | 123 | DPROGKGFMIAMAIITFIALMVIFIMVISHQRV SQGRKF | YLSV IIVSALL  | 172 |
| Danio rerio (b)   | 124 | DPKSGKGFII SVAAITFIAILLIFILVSRQSSSQSPKF  | YLAT I IICAIL | 173 |

TM2

TM3

|                   |     | <b>F312</b>                               |              |     |
|-------------------|-----|-------------------------------------------|--------------|-----|
| Homo sapiens      | 183 | GIMVFIATIVYIMGVNPTAQSSGSLYGSQIYALCNQFYTP  | -AATGLYVDQ   | 231 |
| Pan troglodytes   | 183 | GIMVFIATIVYIMGVNPTAQSSGSLYGSQIYALCNQFYTP  | -AATGLYVDQ   | 231 |
| Canis familiaris  | 182 | GVMFIATIVYIMGVNPTAQASGSLYSSQIYAMCNQFYAS   | -TATGLYMDQ   | 230 |
| Bos taurus        | 183 | GIMMFIATIVYIMGVNPTAQASGSLYSSQIYALCNQFYTP  | -AATGLYVDQ   | 231 |
| Mus musculus      | 181 | GIMVFIATIVYIMGVNPTAQASGSMYGSQIYMICNQFYTP  | -GGTGLYVDQ   | 229 |
| Rattus norvegicus | 183 | GIMVFIATIVYIMGVNPTAQASGSMYGSQIYTIC SQFYTP | -GGTGLYVDQ   | 231 |
| Danio rerio (a)   | 173 | AFFMFIATIVYLVTVYPMAQTSGSVQFNQVYSMCAAYQNP  | -QMSGAFVNQ   | 221 |
| Danio rerio (b)   | 174 | AALMLIATIVYLVTVNPTSQTSGSMMYNQILQLCAQYQ    | QNDQASGIFINQ | 223 |

TM3

|                   |     |                |                        |                  |     |
|-------------------|-----|----------------|------------------------|------------------|-----|
| Homo sapiens      | 232 | YLYHYCVVDPQEAI | AIVLGFMIVAFALIIFFAVK   | TRRKMDRYDKSNILW  | 281 |
| Pan troglodytes   | 232 | YLYHYCVVDPQEAI | AIVLGFMIVAFALIIFFAVK   | TRRKMDRYDKSNILW  | 281 |
| Canis familiaris  | 231 | YLYHYCVVDPQEAI | AIVLGFMVIVAFALIIFFAVK  | TRRKMDRYDKSNILW  | 280 |
| Bos taurus        | 232 | YLYHYCVVDPQEAI | AIVLGFMVIVAFALMIIFFAVK | TRRKMNCDYDKSNILW | 281 |
| Mus musculus      | 230 | YLYHYCVVDPQEAI | AIVLGFMIVAFALIIFFAVK   | TRRKMDRYDKSNILW  | 279 |
| Rattus norvegicus | 232 | YLYHYCVVDPQEAI | AIVLGFMIVAFALIIFFAVK   | TRRKMDRYDKSNILW  | 281 |
| Danio rerio (a)   | 222 | YLYHYCVVDPQEAI | ALVLDVVFVIAALIIIMVFAIK | TRQRINNYGKDNILW  | 271 |
| Danio rerio (b)   | 224 | YLYHYCVVDPEEAI | AIVLGVLVVIIGLIILLVFAVK | TRGLIRKYGRDRVW   | 273 |

TM4

|                   |     |                        |                              |     |
|-------------------|-----|------------------------|------------------------------|-----|
| Homo sapiens      | 282 | DKEHIYDEQ--PPNVEEWVKNV | SAGTQDVPSPPSDYVERVDSPMAYSSNG | 329 |
| Pan troglodytes   | 282 | DKEHIYDEQ--PPNVEEWVKNV | SAGTQDVPSPPSDYVERVDSPMAYSSNG | 329 |
| Canis familiaris  | 281 | DKEHIYDEQ--PPNVEEWVKNV | SAGTQDMPPPPSDYVERVDSPMAYSSNG | 328 |
| Bos taurus        | 282 | DKERIYDEQ--PPNVEEWVKNV | SAGTQDMPPLSDYVERVDSPVAYSSNG  | 329 |
| Mus musculus      | 280 | DKEHIYDEQ--PPNVEEWVKNV | SAGTQDMPPPPSDYAERVDSPMAYSSNG | 327 |
| Rattus norvegicus | 282 | DKEHIYDEQ--PPNVEEWVKNV | SAGTQDMPPPPSDYAERVDSPMAYSSNG | 329 |
| Danio rerio (a)   | 272 | RRVKEFDDQNSPQDVEDWVNNV | NGAPEGLLA-----DYPVKFGSRN     | 312 |
| Danio rerio (b)   | 274 | YDVKTIKDGLTSQIGIWINNV  | SGDPEVFFV-----N              | 304 |

|                   |     |                                                    |     |
|-------------------|-----|----------------------------------------------------|-----|
| Homo sapiens      | 330 | KVNDKRFYPESYKSTP-VPEVVQELPLTSPVDDFRQPRYSSSGNFETPS  | 378 |
| Pan troglodytes   | 330 | KVNDKRFYPESYKSTP-VPEVVQELPLTSPVDDFRQPRYSSSGNFETPS  | 378 |
| Canis familiaris  | 329 | KVNDKRLYPESYKSTP-VPEVVQELPATSPADDFRQPRYSSSGHLEPPS  | 377 |
| Bos taurus        | 330 | KVNEKRLYPESYKSTP-VPEVAQELPLTSPVEDFRQPHYSSSGNLETLS  | 378 |
| Mus musculus      | 328 | KVNGKRSYPESFYKSTPLVPEVAQEIPLTSLVDDFRQPRYSSNGNLETPS | 377 |
| Rattus norvegicus | 330 | KVNGKRSYPSLYKSPPLVPEVAQEIPLTSLVDDFRQPRYSSNDNLETPS  | 379 |
| Danio rerio (a)   | 313 | NLDDN----STSYDKPPLSESPVEILPVRNSVP-----ISSGSEINSS   | 351 |
| Danio rerio (b)   | 305 | DQNDK----VSAAQPMVYSQKPI-YLP-----SSASDLTSS          | 335 |

|                   |     |                                                     |     |
|-------------------|-----|-----------------------------------------------------|-----|
| Homo sapiens      | 379 | KRAPAKGRAGRSKRTEQDHYETDYTTGGESCDELEED-WIREYPPITSDQ  | 427 |
| Pan troglodytes   | 379 | KRAPAKGRAGRSKRTEQDHYETDYTTGGESCDELEED-WIREYPPITSDQ  | 427 |
| Canis familiaris  | 378 | KRAPSKGRTGRPKRLEQDHYETDYTTGGESCDELEED-WIREYPPITSDQ  | 426 |
| Bos taurus        | 379 | KRAPAKGRAGKSRRAEQDHYETDYTTGGESCDELEDD-WIREYPPITSDQ  | 427 |
| Mus musculus      | 378 | KRAPTKGKAGKGRTPDPHYETDYTTGGESCDELEED-WVREYPPITSDQ   | 426 |
| Rattus norvegicus | 380 | KRTPTKGKAGKAKRTDPDPHYETDYTTGGESCDELEED-WLREYPPITSDQ | 428 |
| Danio rerio (a)   | 352 | VGRPKRRRAGRPRPTADGRDYDADY---ASSGDELDDDDFFSEFPPIVNTQ | 398 |
| Danio rerio (b)   | 336 | VSGLKGL-----RAYDA-----GESGDELDTD-----EYPIINEQ       | 367 |
|                   |     |                                                     |     |
| Homo sapiens      | 428 | QRQLYKRNFDTGLQEYKSLQSELDEINKELSRDKELDDYREESEEYMAA   | 477 |
| Pan troglodytes   | 428 | QRQLYKRNFDTGLQEYKSLQSELDEINKELSRDKELDDYREESEEYMAA   | 477 |
| Canis familiaris  | 427 | QRQLYKRNFDTGLQEYKSLQAELEINKELSRDKELDDYREESEEYMAA    | 476 |
| Bos taurus        | 428 | QRQLYKRSFDTGLQEYKSLQAELEVNKELSRDKELDDYREESEEYMAA    | 477 |
| Mus musculus      | 427 | QRQLYKRNFDAGLQEYKSLQAELEDDVNKELSRDKELDDYREESEEYMAA  | 476 |
| Rattus norvegicus | 429 | QRQLYKRNFDAGLQEYKSLLAELDEVNKELSRDLRELDDYREESEEYMAA  | 478 |
| Danio rerio (a)   | 399 | ERDDYKHLFDQDHOEYKDLQAEMDQINKRLAEVDRELDGLQEGSPQFLDA  | 448 |
| Danio rerio (b)   | 368 | ERLEYKRDFDRDHMVYKRLQAELDDINQGLADADRELDRLLEEGSPQFMDV | 417 |
|                   |     |                                                     |     |
| Homo sapiens      | 478 | ADEYNRLKQVKGSAKYKSKKNHCKQLKSKLSHIKKMVG DYDRQKT      | 522 |
| Pan troglodytes   | 478 | ADEYNRLKQVKGSAKYKSKKNHCKQLKSKLSHIKKMVG DYDRQKT      | 522 |
| Canis familiaris  | 477 | ADEYNRLKQVKGSPDYKNKRN YCKQLKSKLSHIKKMVG DYDRQKT     | 521 |
| Bos taurus        | 478 | ADEYNRLKQVKGSAKYKSKRN YCKQLKSKLSHIKKMVG DYDRRKT     | 522 |
| Mus musculus      | 477 | ADEYNRLKQVKGSAKYKSKRN YCKQLKSKLSHIKRMVG DYDRRKP     | 521 |
| Rattus norvegicus | 479 | ADEYNRLKQVKGSAKYKSKRN YCKQLKSKLSHIKRMVG DYDRRKT     | 523 |
| Danio rerio (a)   | 449 | MDEYNAIQDQKRSGEYKQKKRCKYLKAKLNHIKKMVS DYDRRS-       | 492 |
| Danio rerio (b)   | 418 | MDEYNRLKSLKKSTDYQMKKRCKRLKSKLSLIKRRVSDYDHRQ-        | 461 |

**Figure S1.** Multiple alignment of occludin is shown for 8 orthologs [above]. Mutations identified in 5 families are highlighted. Deletions in 4 families are represented by coloured bars; F085 and F275 in green, F386 in red and F375 in orange. The two altered amino acids

in F312 are highlighted in green. The hatched blue bar represents the Marvel domain containing all 4 transmembrane domains [boxed].

TM; transmembrane domain. Human NP\_002529.1; Pan troglodytes XP\_001158288.1; Canus lupus familiaris NP\_001003195.1; Bos taurus; NP\_001075902.1; Mus musculus NP\_112619.2; Rattus norvegicus NP\_112619.2; Danio rerio NP\_997997.1; Danio rerio NP\_001008618.1.

**Table S1.** Clinical information for F085, F351 and F386.

| <b>Feature</b>                       | <b>F085a1</b> | <b>F085a2</b> | <b>F351</b> | <b>F386a1</b> | <b>F386a2</b>      |
|--------------------------------------|---------------|---------------|-------------|---------------|--------------------|
| <b>Gender</b>                        | Female        | Male          | Female      | Female        | Male               |
| <b>Irritability at birth</b>         | +             | +             | -           | -             | -                  |
| <b>Feeding difficulties at birth</b> | +             | -             | -           | -             | -                  |
| <b>Age at first seizure</b>          | 2 weeks       | 2 weeks       | 6 weeks     | 2 days        | N/A                |
| <b>Hypotonia</b>                     | +             | +             | +           | -             | -                  |
| <b>Hyperreflexia</b>                 | -             | +             | +           | +             | +                  |
| <b>Abnormal posturing /dystonia</b>  | +             | +             | -           | -             | -                  |
| <b>Developmental</b>                 | None          | None          | None        | None          | Smiles and babbles |

|                                    |                                                           |                    |                                                                      |                    |                                        |                    |                                                                                    |                    |                                                                                        |                    |
|------------------------------------|-----------------------------------------------------------|--------------------|----------------------------------------------------------------------|--------------------|----------------------------------------|--------------------|------------------------------------------------------------------------------------|--------------------|----------------------------------------------------------------------------------------|--------------------|
| <b>progress</b>                    |                                                           |                    |                                                                      |                    |                                        |                    |                                                                                    |                    |                                                                                        |                    |
| <b>Visual function and hearing</b> | Roving eye movements no fixation; normal retina and BAEPs |                    | No fixation; multifocal retinal grey lesions of unknown significance |                    | No fixation at 4 months; normal retina |                    | Roving eye movements; no fixation                                                  |                    | Mild myopia and astigmatism; no response to light, normal ophthalmological examination |                    |
| <b>Structural malformations</b>    | -                                                         |                    | PDA/PFO<br>Cleft lip                                                 |                    | -                                      |                    | PDA;<br>Transient nephrogenic diabetes insipidus secondary to mild renal dysplasia |                    | Umbilical hernia                                                                       |                    |
| <b>Growth</b>                      | <b>Age</b>                                                | <b>Measurement</b> | <b>Age</b>                                                           | <b>Measurement</b> | <b>Age</b>                             | <b>Measurement</b> | <b>Age</b>                                                                         | <b>Measurement</b> | <b>Age</b>                                                                             | <b>Measurement</b> |
| <b>OFC</b>                         | Birth                                                     | 30cm [-3SD]        | Birth                                                                | 34cm [-1SD]        | Birth                                  | 31cm [-2.5SD]      | 2 days                                                                             | 35cm []            | Birth                                                                                  | 32cm [-2SD]        |



|                                    |             |                  |              |               |                                                                                                     |             |                                                                       |               |            |               |
|------------------------------------|-------------|------------------|--------------|---------------|-----------------------------------------------------------------------------------------------------|-------------|-----------------------------------------------------------------------|---------------|------------|---------------|
|                                    | 1<br>year   | 39cm [-4SD]      | 6.5<br>years | 44cm [-5SD]   | -                                                                                                   | -           | 4.1<br>years                                                          | 46cm [-2.5SD] | 35<br>days | 32cm [-4.5SD] |
| <b>Weight</b>                      | Birth       | 2.56kg [-1SD]    | Birth        | 3.54kg [+1SD] | Birth                                                                                               | 3.2kg [0SD] | Birth                                                                 | 2.4kg []      | Birth      | 3.186kg []    |
|                                    | 1.1<br>year | 9.4kg [0SD]      | 6.5<br>years | 24.6kg [+1SD] | -                                                                                                   | -           | 4.1<br>years                                                          | 8.58kg [-5SD] | 35<br>days | 3.65kg [-2SD] |
| <b>Length</b>                      | 1.1<br>year | 82cm<br>[+1.5SD] | 6.5<br>years | 118cm [0SD]   | -                                                                                                   | -           | 4.1<br>years                                                          | 79cm [-6SD]   | 35<br>days | 52cm [-2SD]   |
| <b>Age at death</b>                | 2.5 years   |                  | 7 years      |               | -                                                                                                   |             | -                                                                     |               | -          |               |
| <b>Congenital infection screen</b> | Negative    |                  | Negative     |               | Negative at birth.<br>Repeat testing (4 months): positive IgG and CMV in urine but not blood or CSF |             | Rubella IgG and negative IgM positive; CMV and toxoplasmosis negative |               | Negative   |               |

Abbreviations: OFC: occipito-frontal circumference; PDA: patent ductus arteriosus; PFO: patent foramen ovale; SD: standard deviation;

N/A: information not available.

**Table S2.** OCLN oligonucleotide primer sequences.

| Exon | Primer name | Direction | Sequence                    | Length (bp) | T <sub>m</sub> (°C) |
|------|-------------|-----------|-----------------------------|-------------|---------------------|
| 2    | OCLNx2F     | Forward   | gggtgggatgaagaaaagaa        | 20          | 59.0                |
| 2    | OCLNx2R     | Reverse   | gcaaacacttaaagttcaacca      | 23          | 58.4                |
| 3    | OCLNx3F     | Forward   | ccaaataagttgtgtctttctgc     | 24          | 59.3                |
| 3    | OCLNx3R     | Reverse   | ccagagtgattctatcacatatctcaa | 27          | 59.9                |
| 4    | OCLNx4F     | Forward   | tgtagaggggtgaattgtgattaag   | 24          | 57.4                |
| 4    | OCLNx4R     | Reverse   | gacacaaattggggcttta         | 20          | 57.6                |
| 5    | OCLNx5F     | Forward   | cccccttttcattacaagataaat    | 24          | 58.8                |
| 5    | OCLNx5R     | Reverse   | gcaaatactcattttacactcagtc   | 26          | 57.7                |
| 6    | OCLNx6F     | Forward   | gtgcagatgtctgctggtgt        | 20          | 59.9                |
| 6    | OCLNx6R     | Reverse   | caacacctggttggtctcct        | 20          | 60.0                |
| 7    | OCLNx7F     | Forward   | gagcattgaatttatgtctgct      | 23          | 57.6                |
| 7    | OCLNx7R     | Reverse   | ggatgctgtacctccacaga        | 20          | 58.7                |
| 8    | OCLNx8F     | Forward   | cataagctgtcattttagctcca     | 24          | 59.8                |
| 8    | OCLNx8R     | Reverse   | gaaaagctctccyccagatg        | 21          | 58.1                |
| 9    | OCLNx9F     | Forward   | cccagcagacctgtttcat         | 20          | 60.1                |
| 9    | OCLNx9R     | Reverse   | ggggttatggtccaaagtca        | 20          | 59.6                |

**Table S3.** Homozygous segments (>5Mb in size) detected using AutoSNPa software and results of SNP array.

| <b>Patient</b> | <b>Chromosome</b> | <b>Position</b>     | <b>Size</b> |
|----------------|-------------------|---------------------|-------------|
| F351           | 1                 | 23225040-39268760   | 16Mb        |
| F351           | 2                 | 197051600-211193600 | 14.14Mb     |
| F375a1         | 2                 | 158427700-173759800 | 15.33Mb     |
| F085a2         | 3                 | 34355650-54003860   | 16.65Mb     |
| F351           | 4                 | 6988317-16894910    | 9.91Mb      |
| F351           | 4                 | 20502520-37166220   | 16.66Mb     |
| F351           | 5                 | 66092530-115792100  | 49.70Mb     |
| F085a1         | 5                 | 53643760-74142270   | 20.50Mb     |
| F085a2         | 5                 | 53643760-75313620   | 21.67Mb     |
| F275           | 5                 | 37997960-75229940   | 37.23Mb     |
| F375a1         | 5                 | 68154750-79393880   | 11.24Mb     |
| F375a2         | 5                 | 68154750-86808550   | 18.65Mb     |
| F085a1         | 6                 | 102280700-138037600 | 35.76Mb     |
| F085a1         | 6                 | 162096700-167501600 | 5.4Mb       |
| F351           | 7                 | 95899670-105006100  | 9.11Mb      |

|        |    |                     |         |
|--------|----|---------------------|---------|
| F375a1 | 7  | 152287000-158787600 | 6.5Mb   |
| F351   | 8  | 41746400-62115350   | 20.37Mb |
| F085a1 | 9  | 14955090-86714350   | 71.76Mb |
| F085a1 | 9  | 90773460-95847350   | 5.07Mb  |
| F085a2 | 9  | 14955090-39309750   | 24.35Mb |
| F375a1 | 11 | 46884030-56214360   | 9.33Mb  |
| F085a1 | 11 | 1745827-37297360    | 35.55Mb |
| F375a2 | 11 | 48144890-56371960   | 8.23Mb  |
| F375a1 | 12 | 50803560-67885550   | 17.08Mb |
| F375a2 | 12 | 48588440-67885550   | 19.03Mb |
| F375a2 | 12 | 20467460-29674340   | 9.21Mb  |
| F375a2 | 12 | 30927630-41339610   | 10.41Mb |
| F085a1 | 13 | 52534140-68471840   | 15.94Mb |
| F351   | 14 | 47603580-69443730   | 21.84Mb |
| F085a2 | 16 | 1688439-10889550    | 9.20Mb  |
| F275   | 17 | 5438682-13823320    | 8.38Mb  |

|        |    |                    |         |
|--------|----|--------------------|---------|
| F351   | 18 | 44818930-65667260  | 20.85Mb |
| F375a1 | 18 | 11625170-38706840  | 27.08Mb |
| F351   | 19 | 17596520-40072490  | 2.48Mb  |
| F275   | 19 | 17688070-35037140  | 17.35Mb |
| F375a2 | 19 | 34252640-59312250  | 25.06Mb |
| F375a1 | 21 | 29269400-46940180  | 17.67Mb |
| F375a2 | 21 | 29698160-46940180  | 17.21Mb |
| F351   | X  | 232264670-36351700 | 13.09Mb |
| F085a1 | X  | 44550940-109168400 | 64.62Mb |
